# Supplementary material for: Visual impairment as a predictor for deterioration in functioning: the Leiden 85-plus Study
Source: PubMed Central journal article supplement (PMC9074345; doi:10.1186/s12877-022-03071-x), 2022-05-06
Supplement: 12877_2022_3071_MOESM1_ESM.pdf [file 12877_2022_3071_MOESM1_ESM.pdf]

## Additional file 1. Sensitivity analysis according to cut-off values

**Description of data:** the overall analysis was repeated with different cut-off values for visual impairment; (1) three equal groups according to 33% tertiles (high, medium and low vision), (2) three groups following the International Classification of Diseases and Related Health Problems (ICD-10) guidelines, with a visual acuity below 0.33 defined as low vision and 0.5 or higher as normal vision, (3) decrease per 0.1 point in vision.

### Stratified according to tertiles

A sensitivity analysis was done with different cut-off values. When dividing the participants according to tertiles, the same group distribution was formed with identical results as the original analysis.

### Stratified according to the ICD-10 guidelines

An overview of the baseline characteristics according to cut-off values, following the ICD-10 guidelines is given in Supplementary table S1. *P* for trend was significant for nearly the same variables as the original analysis, with the exception of male gender ( $p = 0.226$ ) and arthritis ( $p = 0.068$ ). Moreover, Parkinson's disease became significant with a  $p$  value of 0.045, occurring more often in the group with low vision.

**Supplementary table S1.** Baseline characteristics, according to levels of vision in ICD-10.

|                                                      | All<br>N = 548   | Normal vision<br>N = 430 | Mild vision<br>N = 48 | Low vision<br>N = 70 | <i>P Value</i> * |
|------------------------------------------------------|------------------|--------------------------|-----------------------|----------------------|------------------|
| <b>Demographics and health (No., %)</b>              |                  |                          |                       |                      |                  |
| Male                                                 | 184 (33.6)       | 152 (35.3)               | 12 (25)               | 20 (28.6)            | 0.226            |
| Living arrangements: Independently                   | 462 (84.3)       | 378 (87.9)               | 35 (72.9)             | 49 (70.0)            | < 0.001          |
| Education > elementary school °                      | 193 (35.2)       | 154 (35.8)               | 16 (33.3)             | 23 (32.9)            | 0.883            |
| High income °                                        | 271 (49.5)       | 225 (52.3)               | 18 (37.5)             | 28 (40.0)            | 0.039            |
| <b>Chronic diseases</b>                              |                  |                          |                       |                      |                  |
| Arthritis/osteoarthritis °                           | 179 (32.7)       | 150 (34.9)               | 14 (29.2)             | 15 (21.4)            | 0.068            |
| Obstructive pulmonary disease                        | 63 (11.5)        | 49 (11.4)                | 5 (10.4)              | 9 (12.9)             | 0.911            |
| Cerebrovascular accident °                           | 44 (8.0)         | 33 (7.7)                 | 6 (12.5)              | 5 (7.1)              | 0.458            |
| Myocardial infarction °                              | 56 (10.2)        | 43 (10.0)                | 4 (8.3)               | 9 (12.9)             | 0.695            |
| Parkinson's disease                                  | 11 (2.0)         | 7 (1.6)                  | 0 (0.0)               | 4 (5.7)              | 0.045            |
| Malignancy °                                         | 100 (18.2)       | 77 (17.9)                | 10 (20.8)             | 13 (18.6)            | 0.869            |
| Diabetes mellitus °                                  | 79 (14.4)        | 50 (11.6)                | 13 (27.1)             | 16 (22.9)            | 0.001            |
| Severe cognitive impairment (MMSE < 19) °            | 89 (16.2)        | 56 (13.0)                | 12 (25.0)             | 21 (30.0)            | < 0.001          |
| History fall °                                       | 93 (17.2)        | 72 (16.9)                | 11 (22.9)             | 10 (14.8)            | 0.659            |
| Hip fracture °                                       | 33 (6.1)         | 21 (4.9)                 | 3 (6.4)               | 9 (12.9)             | 0.012            |
| <b>Functioning and quality of life (median, IQR)</b> |                  |                          |                       |                      |                  |
| <b>Physical functioning:</b>                         |                  |                          |                       |                      |                  |
| BADL (n=547)                                         | 10.0 (9.0-14.0)  | 9.0 (9.0-12.0)           | 11.0 (9.0-16.8)       | 13.0 (9.0-13.0)      | < 0.001          |
| IADL (n=547)                                         | 18.0 (12.0-25.0) | 16.0 (12.0-23.0)         | 22.0 (12.3-31.8)      | 24.0 (16.0-34.0)     | < 0.001          |
| Cognitive functioning: MMSE                          | 26.0 (23.0-28.0) | 27.0 (24.0-28.0)         | 25.5 (20.3-28.0)      | 24.0 (18.0-28.0)     | < 0.001          |
| Psychological functioning: GDS (n=475) #             | 2.0 (1.0-3.0)    | 2.0 (1.0-3.0)            | 2.0 (1.0-4.0)         | 3.0 (1.0-4.8)        | 0.001            |
| Social functioning: DJG (n=476) #                    | 1.0 (0.0-3.0)    | 1.0 (0.0-2.0)            | 2 (0.0-4.3)           | 2.0 (1.0-3.0)        | < 0.001          |
| Quality of Life: Cantril (n=521)                     | 8.0 (7.0-9.0)    | 8.0 (7.0-9.0)            | 7.0 (6.0-8.0)         | 7.0 (6.0-8.5)        | 0.016            |

BADL, Basic Activities Daily Living (range 9-36); IADL, Instrumental Activities Daily Living (range 9-63); MMSE, Mini Mental State Examination (range 0-30); GDS, Geriatric Depression Scale (range 0-15); DJG, De Jong Gierveld Loneliness Scale (range 0-11); Cantril, Cantril's ladder of life (range 0-10); IQR, Interquartile Range. The median and interquartile ranges are provided when continuous variables have an asymmetric distribution. For categorical variables percentages are presented. \**P Value* for between group comparison with regard to vision, measured with *P for trend*: for categorical data with Linear-by-Linear Association, for continuous data with Jonckheere-Terpstra Test. ° Missing data for specific variables, according to three groups (severe – moderate – no impairment): 0-7 missing. # Assessed only in participants with MMSE > 18.

A linear association was found for the level of functioning and time ( $p < 0.001$ ), however, for the Loneliness scale the basic annual change correlation was lacking ( $p = 0.873$ ). The additional annual change for BADL in the group with low vision was leaning towards a trend with an increase of 0.33 points, however, not significant ( $p = 0.058$ , SE 0.174). Moreover, low vision was associated with a significant additional annual increase of 0.13 points for the Cantril's Ladder ( $p = 0.028$ , SE 0.059). The effect of visual impairment on the level of functioning and quality of life is demonstrated in Supplementary table S2.

**Supplementary table S2.** Effect of visual impairment on functioning and quality of life, ICD-10.

|         | Basic annual change |       |                | Additional annual change |       |                |            |       |                |
|---------|---------------------|-------|----------------|--------------------------|-------|----------------|------------|-------|----------------|
|         | Normal vision       |       |                | Mild vision              |       |                | Low vision |       |                |
|         | $\beta_1$           | SE    | <i>P Value</i> | $\beta_2$                | SE    | <i>P Value</i> | $\beta_2$  | SE    | <i>P Value</i> |
| BADL    | 1.22                | 0.056 | < <b>0.001</b> | 0.09                     | 0.199 | 0.660          | 0.33       | 0.174 | 0.058          |
| IADL    | 2.26                | 0.058 | < <b>0.001</b> | 0.11                     | 0.207 | 0.579          | -0.32      | 0.181 | 0.080          |
| MMSE    | -0.75               | 0.038 | < <b>0.001</b> | 0.09                     | 0.135 | 0.492          | -0.10      | 0.117 | 0.397          |
| GDS     | 0.30                | 0.029 | < <b>0.001</b> | -0.13                    | 0.104 | 0.219          | 0.03       | 0.099 | 0.748          |
| DJG     | 0.03                | 0.023 | 0.126          | -0.15                    | 0.078 | 0.063          | -0.06      | 0.074 | 0.421          |
| Cantril | -0.21               | 0.017 | < <b>0.001</b> | 0.10                     | 0.063 | 0.123          | 0.13       | 0.059 | <b>0.028</b>   |

SE, standard error. *P Values* were estimated by analysis of linear mixed models, significant when *P Value* < 0.05; function of the linear mixed model according to:  $y = \alpha + \beta x$ .  $\beta$  firstly represents the basic annual change over time without impairment; and secondly the additional annual change for people with visual impairment.  $\beta$  is given with corresponding SE.

### Cross-sectional correlation

Analysis of the cross-sectional effect showed that BADL decreased with 5.83 points when vision increased with one unit. This effect was statistically significant with a *p* value < 0.001. However, solely 7.7% of the variance in vision can be explained by functional status. Significant patterns were found for IADL, MMSE, GDS and DJG ( $p < 0.001$ ). Furthermore, quality of life increased with 1.03 points when vision rose with one unit ( $p = 0.001$ ). Results are depicted in Supplementary table S3.

**Supplementary table S3.** Cross-sectional effect of decline in vision per point on level of functioning.

|                                      | $\beta$ | SE    | $R^2$ | <i>P Value</i> |
|--------------------------------------|---------|-------|-------|----------------|
| Basic Activities Daily Living        | -5.83   | 0.867 | 0.077 | < <b>0.001</b> |
| Instrumental Activities Daily Living | -11.62  | 1.400 | 0.112 | < <b>0.001</b> |
| Mini Mental State Examination        | 6.30    | 0.875 | 0.087 | < <b>0.001</b> |
| Geriatric Depression Scale           | -2.12   | 0.464 | 0.042 | < <b>0.001</b> |
| De Jong Gierveld Loneliness Scale    | -1.51   | 0.421 | 0.026 | < <b>0.001</b> |
| Cantril's Ladder                     | 1.03    | 0.317 | 0.020 | <b>0.001</b>   |

SE, standard error. *P Values* were estimated using linear regression analysis, significant when *P Value* < 0.05; function of the linear mixed model according to:  $y = \alpha + \beta x$ .  $\beta$  is the unstandardized  $\beta$  and it refers to the number of units the functional assessment tools increase for a single unit increase in vision.  $\beta$  is given with corresponding SE.  $R^2$  indicates the proportion of variance in vision that can be explained by the functional levels.
